# Supplementary material
Source: publisher site journal article supplement (https://www.degruyterbrill.com/publication/journal_key/SJPAIN/downloadAsset/SJPAIN_SJPAIN_Template%20for%20Ethical%20and%20Legal%20Declarations.pdf)
Supplement: Supplementary file 1 [file SJPAIN_SJPAIN_Template%20for%20Ethical%20and%20Legal%20Declarations.pdf]

---

Please provide the requested information in the format and order indicated in the template. Refer to the author instructions below. Make sure that the information in this template is the same as the information in the manuscript.

---

[TEMPLATE]

| <b>STATEMENT</b>                                                | <b>TEXT</b> |
|-----------------------------------------------------------------|-------------|
| <b>Acknowledgments*</b>                                         |             |
| <b>Research ethics</b>                                          |             |
| <b>Informed consent</b>                                         |             |
| <b>Author contributions</b>                                     |             |
| <b>Competing interests</b>                                      |             |
| <b>Research funding</b>                                         |             |
| <b>Data availability</b>                                        |             |
| <b>*Artificial intelligence/<br/>Machine learning<br/>tools</b> |             |
|                                                                 |             |
|                                                                 |             |
|                                                                 |             |
|                                                                 |             |

\*We do not accept submissions that name Artificial Intelligence (AI) and/or Machine Learning Tools as credited author(s) on a manuscript because such tools cannot take responsibility for the submitted work and therefore cannot be considered as eligible authors. Where such tools or technologies are used as part of the design or methodology of a research study, their use should be clearly described in the Acknowledgments section.

## [AUTHOR INSTRUCTIONS]

### [MANDATORY STATEMENTS]

#### **Acknowledgments**

If not applicable, remove this paragraph.

#### **Research ethics**

State the appropriate information, including that the study was conducted in accordance with the Declaration of Helsinki (as revised in 2013).

For studies on humans, the following or a similar statement should be included: "Research involving human subjects complied with all relevant national regulations, institutional policies and is in accordance with the tenets of the Helsinki Declaration (as amended in 2013), and has been approved by the authors' Institutional Review Board (IRB #xxxx) or equivalent research ethical committee (REC# xxx-Nr.: xx/x)."

For studies on animals, the following or a similar statement should be included: "Research involving animals complied with all relevant national regulations and institutional policies (xxxx) for the care and use of animals (xxx-Nr.: xx/x)."

If not required, please insert

- "The Local/Regional/National Institutional Review Board deemed the study exempt from review" (if the IRB specifically exempted the study from review )   **OR**
- "Not applicable."

For reporting clinical trials, please provide the name of the registry and the trial registration number. Examples of acceptable registries are: EudraCT, ClinicalTrials.gov, ISRCTN.

#### **Informed consent**

If required, please insert

- "Informed consent was obtained from all individuals included in this study, or their legal guardians or wards."
- If not required, please insert
- "Not applicable."

#### **Author contributions**

Insert the mandatory default statement and include more detailed information about an individual author's contribution, if applicable.

- "The author(s) have (has) accepted responsibility for the entire content of this manuscript and approved its submission."

#### **Competing interests**

State if any author(s) has/have a conflict of interest, including the name of the author(s) and the reason, followed by "All other authors state no conflict of interest" (if applicable).

If none of the authors has a conflict of interest, please insert

- "The author(s) state(s) no conflict of interest."

## Research funding

State if your study was financially supported  
(add funding agency and grant number, if applicable).  
If not required, please insert  
- “None declared.”

## Data availability

This statement should include information on where data supporting the results reported in the article can be found. If applicable, please insert:

- “The raw data can be obtained on request from the corresponding author.” **OR**
- “Complete datasets, generated or analysed during this study, are not shared due to confidentiality/commercial clauses.”

If the type of study does not include raw data, please insert  
- “Not applicable.”

## Artificial intelligence/ Machine learning tools

If applicable, please state if such technologies/tools were used (please specify the following: which model was used, e.g., AiryChat, BARD AI, ChatGPT, ChatSonic, or CopyAI, which version, what was the purpose of using AI, how was the model used) and acknowledge them in the Acknowledgements.

- If none used, please insert
- “Not applicable.”

### [OPTIONAL STATEMENTS]

In addition to the information in the Template, you can provide information on important aspects below by adding the statement(s) to the template. Make sure you follow the order and terminology given in the template.

**| Consultant or advisory role | Role of sponsor | Employment or leadership | Honorarium | Patents  
| Other remunerations | Software availability |**
